# Supplementary material
Source: PubMed Central journal article supplement (PMC3705631)
Supplement: 97320630009541S1.pdf [file 97320630009541S1.pdf]

## Supplementary material:

**Table 1:** Performance comparison of microsatellite mining software GMATo, SSR Locator and MISA in *Setaria Italica* whole genome

| Soft        | <i>Setaria Italica</i> whole genome |                |                | SSR Loci |
|-------------|-------------------------------------|----------------|----------------|----------|
|             | Windows*                            | Linux#         | Mac&           |          |
| GMATo       | 10m0s                               | 8m40s          | 8m6s           | 46,739   |
| SSR Locator | >12h+                               | Not executable | Not executable | 46,625   |
| MISA        | 16m11s                              | 12m14s         | 15m13s         | 46,782   |

SSR motif length ranging from 2 to 10 bp, minimum repeated times at least 5. SSR locator V1.1 and MISA was downloaded from official site <http://www.ufpel.tche.br/> and <http://pgrc.ipk-gatersleben.de/misa/> respectively.

Foxtail millet (*Setaria Italica*) whole genome sequence (~515Mb) file Sitalica\_164.fa was downloaded from phytozome <http://www.phytozome.net/>.

\*environment: HP 8000 Elite 32 byte Windows 7, Inter core2 CPU 2.83 GHz, 4G RAM, disk space 500 G ; # environment: Linux gridview 2.6.18, 64 byte, AMD Opteron Processor 612 CPU 2.0 GHz, 66G RAM, disk space 500G; & environment: Mac Pro OS 10.7.5, Intel Xeon CPU 2.66 GHZ, 12G RAM, disk space 1T; + Summary of SSR loci was produced at 29m49s but it took more than 12 hours to export mined SSR data.
